# Supplementary material
Source: Springer Nature journal article supplement (https://www.springermedizin.de/resource/supplementary/12979_2005_21_MOESM3_ESM.pdf/9603184)

**A.**

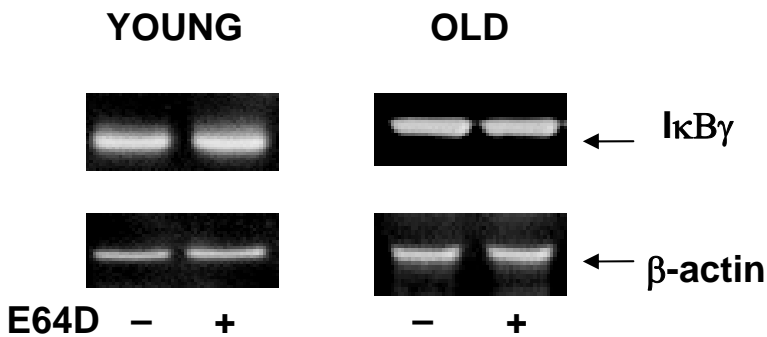

**B.**

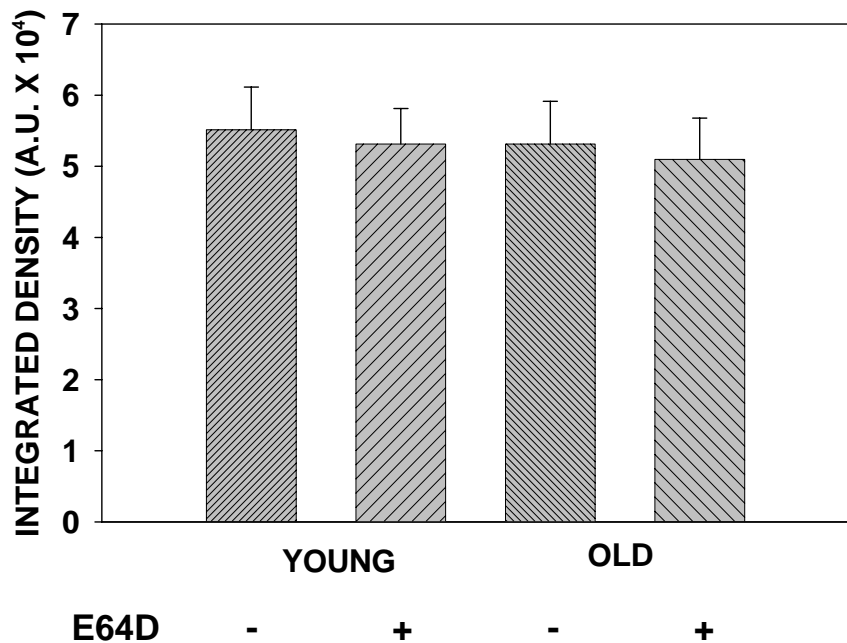

Supplement: MOESM3 [file 9603184]
